# Supplementary material for: Design and Prototype Development Of A Harvesting Machine Mower For Poppy (Papaver Somniferum L.) Plant
Source: Research Square preprint supplement (doi:10.21203/rs.3.rs-6954412/v1), 2025-06-27
Supplement: Supplementary file 1 [file 67f69534f0303a09f1cd452d.docx]

**Design and Prototype Development Of A Harvesting Machine Mower For Poppy (*Papaver Somniferum L.)* Plant**


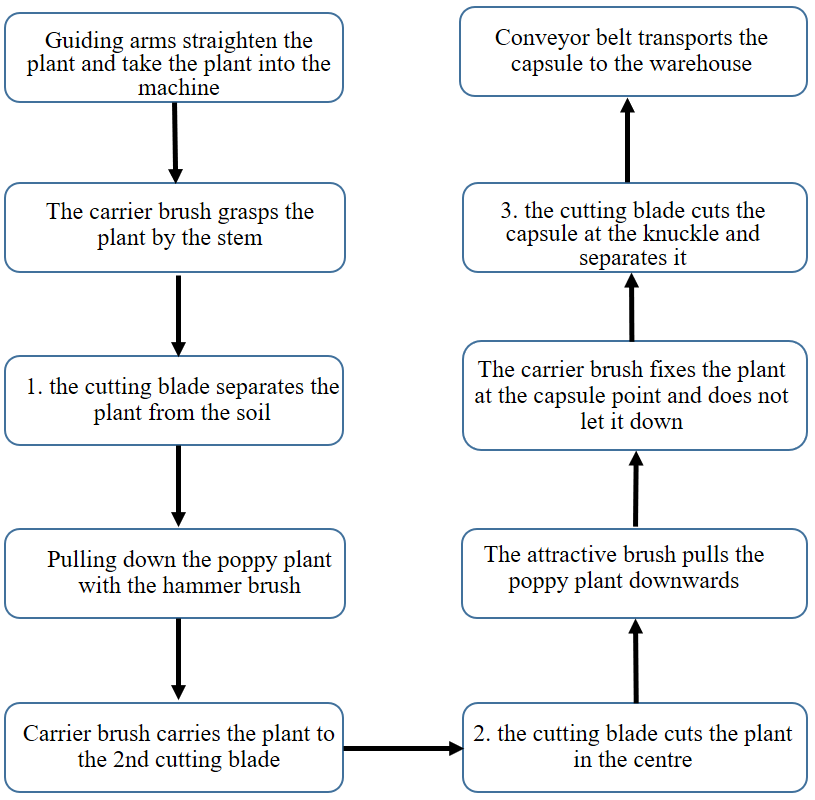


Figure 2.1. Work flow chart of the prototype machine


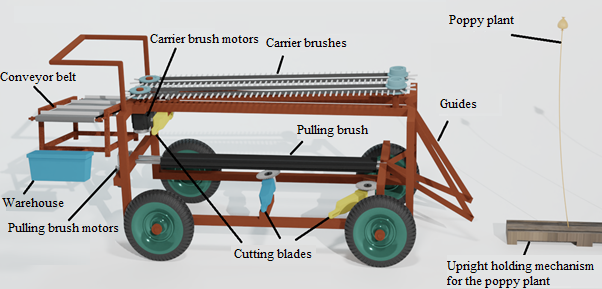


Figure 2.9. Prototype machine solid model side view
